# Supplementary material for: Compete or Cooperate with ‘Dr. Google’? Small Animal Veterinarians’ Attitudes towards Clients’ Use of Internet Resources—A Comparative Study across Austria, Denmark and the UK
Source: MDPI journal article supplement (doi:10.3390/ani12162117), 2022-08-18
Supplement: s1 [file s1]

## Supplementary File S2:

Socio-demographic and practice-specific factors for the whole study population and each sub-population from Austria, Denmark and UK

|                                                   | All countries<br>(N=608-641) | Austria<br>(n=94-101) | Denmark<br>(n=161-172) | United<br>Kingdom<br>(n=353-368) | Tests                                                                                                                                                                         |
|---------------------------------------------------|------------------------------|-----------------------|------------------------|----------------------------------|-------------------------------------------------------------------------------------------------------------------------------------------------------------------------------|
| GENDER                                            |                              |                       |                        |                                  | $\chi^2(2)=2.324$ , $p=0.313$                                                                                                                                                 |
| Male                                              | 179 (28.1)                   | 25 (25.0)             | 43 (25.0)              | 111 (30.5)                       |                                                                                                                                                                               |
| Female                                            | 457 (71.9)                   | 75 (75.0)             | 129 (75.0)             | 253 (69.5)                       |                                                                                                                                                                               |
| AGE (in years)                                    |                              |                       |                        |                                  | $H(2)=4.877$ , $p=0.087$                                                                                                                                                      |
| 23-29                                             | 86 (14.1)                    | 5 (5.3)               | 16 (9.9)               | 65 (18.4)                        |                                                                                                                                                                               |
| 30-39                                             | 143 (23.5)                   | 21 (22.3)             | 40 (24.8)              | 82 (23.2)                        |                                                                                                                                                                               |
| 40-49                                             | 145 (23.8)                   | 27 (28.7)             | 40 (24.8)              | 78 (22.1)                        |                                                                                                                                                                               |
| 50-59                                             | 161 (26.5)                   | 37 (39.4)             | 42 (26.1)              | 82 (23.2)                        |                                                                                                                                                                               |
| ≥ 60                                              | 73 (12.0)                    | 4 (4.3)               | 23 (14.3)              | 46 (13.0)                        |                                                                                                                                                                               |
| WORK EXPERIENCE (in years)                        |                              |                       |                        |                                  | $H(2)=0.740$ , $p=0.691$                                                                                                                                                      |
| 0.5-5                                             | 135 (21.2)                   | 11 (11.1)             | 39 (22.9)              | 85 (23.2)                        |                                                                                                                                                                               |
| 6-10                                              | 69 (10.8)                    | 14 (14.1)             | 19 (11.2)              | 36 (9.8)                         |                                                                                                                                                                               |
| 11-20                                             | 132 (20.8)                   | 29 (29.3)             | 32 (18.8)              | 71 (19.3)                        |                                                                                                                                                                               |
| ≥21                                               | 300 (47.2)                   | 45 (45.5)             | 80 (47.1)              | 175 (47.7)                       |                                                                                                                                                                               |
| BUSINESS TYPE                                     |                              |                       |                        |                                  | $\chi^2(2)=131.089$ , $p<0.001$<br>AT vs. DK: $\chi^2(1)=14.254$ , $p<0.001^a$<br>AT vs. UK: $\chi^2(1)=90.990$ , $p<0.001^a$<br>DK vs. UK: $\chi^2(1)=65.963$ , $p<0.001^a$  |
| Independently owned                               | 370 (57.7)                   | 96 (95.0)             | 131 (76.2)             | 143 (38.9)                       |                                                                                                                                                                               |
| Corporate owned                                   | 216 (33.7)                   | 2 (2.0)               | 28 (16.3)              | 186 (50.5)                       |                                                                                                                                                                               |
| Other <sup>b</sup> (incl. university and shelter) | 55 (8.6)                     | 3 (3.0)               | 13 (7.6)               | 39 (10.6)                        |                                                                                                                                                                               |
| EMPLOYMENT STATUS                                 |                              |                       |                        |                                  | $\chi^2(2)=106.720$ , $p<0.001$<br>AT vs. DK: $\chi^2(1)=45.496$ , $p<0.001^a$<br>AT vs. UK: $\chi^2(1)=107.088$ , $p<0.001^a$<br>DK vs. UK: $\chi^2(1)=10.785$ , $p=0.003^a$ |
| Self-employed                                     | 226 (35.3)                   | 80 (79.2)             | 62 (36.3)              | 83 (22.6)                        |                                                                                                                                                                               |
| Employed                                          | 393 (61.4)                   | 20 (19.8)             | 105 (61.0)             | 268 (73.0)                       |                                                                                                                                                                               |
| Other <sup>b</sup> (retired and unspecified)      | 21 (3.3)                     | 1 (1.0)               | 4 (2.3)                | 16 (4.4)                         |                                                                                                                                                                               |

Counts (percentage)

<sup>a</sup> Bonferroni correction was applied for multiple comparison between three countries and significant variables

<sup>b</sup> Answer option "Other" were excluded from bivariate statistics
