# Supplementary material for: Compete or Cooperate with ‘Dr. Google’? Small Animal Veterinarians’ Attitudes towards Clients’ Use of Internet Resources—A Comparative Study across Austria, Denmark and the UK
Source: MDPI journal article supplement (doi:10.3390/ani12162117), 2022-08-18
Supplement: s1 [file s1]

### Supplementary File S3:

Ordinal regression analyses of socio-demographic and practice-specific factors on attitudes towards clients' use of internet resources

| <b>Model 1 AUSTRIA: Clients' use of internet resources results in greater acceptance of advanced diagnostics and treatments</b><br>( $\chi^2(8)=15.900$ , $P=0.044$ )  |        |            |                 |    |        |
|------------------------------------------------------------------------------------------------------------------------------------------------------------------------|--------|------------|-----------------|----|--------|
|                                                                                                                                                                        |        |            | Hypothesis Test |    |        |
|                                                                                                                                                                        | B      | Std. Error | Wald Chi-Square | df | Sig.   |
| Gender ( <i>ref. cat.: female</i> )                                                                                                                                    | 1.240  | 0.6497     | 3.644           | 1  | 0.56   |
| Percentage of clients using internet resources (1=None-19%) ( <i>ref.cat.: over 60%</i> )                                                                              | 0.302  | 0.7690     | 0.154           | 1  | 0.695  |
| Percentage of clients using internet resources (2=20-59%) ( <i>ref.cat.: over 60%</i> )                                                                                | -0.204 | 0.5442     | 0.141           | 1  | 0.707  |
| Frequency of situations in which clients question vet's advice (1=Never) ( <i>ref.cat.=Frequently/Always</i> )                                                         | 5.844  | 1.7614     | 11.009          | 1  | <0.001 |
| Frequency of situations in which clients question vet's advice (2=Occasionally) ( <i>ref.cat.=Frequently/Always</i> )                                                  | 5.058  | 1.7270     | 8.578           | 1  | 0.003  |
| Employment type ( <i>ref. cat.: employed</i> )                                                                                                                         | 1.041  | 0.6960     | 2.235           | 1  | 0.214  |
| age                                                                                                                                                                    | -0.040 | 0.0321     | 1.542           | 1  | 0.214  |
| Impact of internet resources on clients' desire to pursue therapy                                                                                                      | 0.088  | 0.2047     | 0.186           | 1  | 0.666  |
| <b>Model 1 DENMARK: Clients' use of internet resources results in greater acceptance of advanced diagnostics and treatments.</b><br>( $\chi^2(9)=17.604$ , $P=0.040$ ) |        |            |                 |    |        |
| Gender ( <i>ref. cat.: female</i> )                                                                                                                                    | 1.137  | 0.4888     | 5.411           | 1  | 0.020  |

|                                                                                                                                                                   |        |        |       |   |       |
|-------------------------------------------------------------------------------------------------------------------------------------------------------------------|--------|--------|-------|---|-------|
| Percentage of clients using internet resources (1=None-19%) ( <i>ref.cat.: over 60%</i> )                                                                         | -0.635 | 0.5565 | 1.301 | 1 | 0.254 |
| Percentage of clients using internet resources (2=20-59%) ( <i>ref.cat.: over 60%</i> )                                                                           | -0.044 | 3.992  | 0.012 | 1 | 0.913 |
| Frequency of situations in which clients question vet's advice (1=Never) ( <i>ref.cat.=Frequently/Always</i> )                                                    | 0.873  | 0.7259 | 1.448 | 1 | 0.229 |
| Frequency of situations in which clients question vet's advice (2=Occasionally) ( <i>ref.cat.=Frequently/Always</i> )                                             | 0.097  | 0.4520 | 0.046 | 1 | 0.830 |
| Employment type ( <i>ref. cat.: employed</i> )                                                                                                                    | 0.614  | 0.4411 | 1.937 | 1 | 0.164 |
| age                                                                                                                                                               | 0.016  | 0.0181 | 0.806 | 1 | 0.369 |
| Impact of internet resources on clients' desire to pursue therapy                                                                                                 | -0.012 | 0.1501 | 0.007 | 1 | 0.935 |
| Business type ( <i>ref. cat.: corporate-owned</i> )                                                                                                               | 0.482  | 0.5016 | 0.922 | 1 | 0.337 |
| <b>Model 1 UK: Clients' use of internet resources results in greater acceptance of advanced diagnostics and treatments.</b><br>( $\chi^2(9)=26.522$ , $P=0.002$ ) |        |        |       |   |       |
| Gender ( <i>ref. cat.: female</i> )                                                                                                                               | -0.133 | 0.2799 | 0.227 | 1 | 0.031 |
| Percentage of clients using internet resources (1=None-19%) ( <i>ref.cat.: over 60%</i> )                                                                         | -0.927 | 0.4287 | 4.679 | 1 | 0.031 |

|                                                                                                                                                                         |        |        |        |   |        |
|-------------------------------------------------------------------------------------------------------------------------------------------------------------------------|--------|--------|--------|---|--------|
| Percentage of clients using internet resources (2=20-59%) ( <i>ref.cat.: over 60%</i> )                                                                                 | -0.232 | 0.2714 | 0.729  | 1 | 0.393  |
| Frequency of situations in which clients question vet's advice (1=Never) ( <i>ref.cat.=Frequently/Always</i> )                                                          | 0.454  | 0.6257 | 0.527  | 1 | 0.393  |
| Frequency of situations in which clients question vet's advice (2=Occasionally) ( <i>ref.cat.=Frequently/Always</i> )                                                   | 0.951  | 0.3609 | 6.940  | 1 | 0.008  |
| Employment type ( <i>ref. cat.: employed</i> )                                                                                                                          | -0.443 | 0.3338 | 1.759  | 1 | 0.185  |
| age                                                                                                                                                                     | 0.036  | 0.0102 | 12.210 | 1 | <0.001 |
| Impact of internet resources on clients' desire to pursue therapy                                                                                                       | 0.166  | 0.1073 | 2.402  | 1 | 0.121  |
| Business type ( <i>ref. cat.: corporate-owned</i> )                                                                                                                     | -0.206 | 0.2443 | 0.709  | 1 | 0.400  |
| <b>Model 2 AUSTRIA: Clients' use of internet resources results in greater expectations of advanced diagnostics and treatments.</b><br>( $\chi^2(8)=5.573$ , $P=0.695$ ) |        |        |        |   |        |
| Gender ( <i>ref. cat.: female</i> )                                                                                                                                     | 1.091  | 0.6635 | 2.706  | . | 0.100  |
| Percentage of clients using internet resources (1=None-19%) ( <i>ref.cat.: over 60%</i> )                                                                               | -0.530 | 0.7962 | 0.442  | 1 | 0.506  |
| Percentage of clients using internet resources (2=20-59%) ( <i>ref.cat.: over 60%</i> )                                                                                 | -0.089 | 0.5044 | 0.031  | 1 | 0.859  |
| Frequency of situations in which clients question vet's                                                                                                                 | -0.338 | 1.4315 | 0.056  | 1 | 0.813  |

|                                                                                                                                                                       |        |        |       |   |       |
|-----------------------------------------------------------------------------------------------------------------------------------------------------------------------|--------|--------|-------|---|-------|
| advice (1=Never)<br>(ref.cat.=Frequently/Always)                                                                                                                      |        |        |       |   |       |
| Frequency of situations in<br>which clients question vet's<br>advice (2=Occasionally)<br>(ref.cat.=Frequently/Always)                                                 | -0.100 | 1.3919 | 0.005 | 1 | 0.943 |
| Employment type (ref. cat.:<br>employed)                                                                                                                              | -0.120 | 0.7155 | 0.028 | 1 | 0.867 |
| age                                                                                                                                                                   | -0.012 | 0.0345 | 0.117 | 1 | 0.732 |
| Impact of internet resources<br>on clients' desire to pursue<br>therapy                                                                                               | 0.315  | 0.2009 | 2.455 | 1 | 0.117 |
| <b>Model 2 DENMARK: Clients' use of internet resources results in greater expectations of advanced diagnostics and treatments.</b><br>( $\chi^2(9)=17.115$ , P=0.047) |        |        |       |   |       |
| Gender (ref. cat.: female)                                                                                                                                            | 0.752  | 0.4757 | 2.324 | 1 | 0.127 |
| Percentage of clients using<br>internet resources (1=None-<br>19%) (ref.cat.: over 60%)                                                                               | -0.485 | 0.5183 | 0.875 | 1 | 0.350 |
| Percentage of clients using<br>internet resources (2=20-<br>59%) (ref.cat.: over 60%)                                                                                 | -0.121 | 0.3970 | 0.092 | 1 | 0.761 |
| Frequency of situations in<br>which clients question vet's<br>advice (1=Never)<br>(ref.cat.=Frequently/Always)                                                        | 0.192  | 0.7786 | 0.061 | 1 | 0.805 |
| Frequency of situations in<br>which clients question vet's<br>advice (2=Occasionally)<br>(ref.cat.=Frequently/Always)                                                 | -0.140 | 0.4432 | 0.100 | 1 | 0.751 |

|                                                                                                                                                                     |        |        |        |   |        |
|---------------------------------------------------------------------------------------------------------------------------------------------------------------------|--------|--------|--------|---|--------|
| Employment type ( <i>ref. cat.: employed</i> )                                                                                                                      | -0.442 | 0.4269 | 1.073  | 1 | 0.300  |
| age                                                                                                                                                                 | 0.039  | 0.0181 | 4.684  | 1 | 0.030  |
| Impact of internet resources on clients' desire to pursue therapy                                                                                                   | 0.242  | 0.1442 | 2.814  | 1 | 0.093  |
| Business type ( <i>ref. cat.: corporate-owned</i> )                                                                                                                 | 0.750  | 0.4754 | 2.487  | 1 | 0.115  |
| <b>Model 2 UK: Clients' use of internet resources results in greater expectations of advanced diagnostics and treatments.</b><br>( $\chi^2(9)=59.542$ , $P<0.001$ ) |        |        |        |   |        |
| Gender ( <i>ref. cat.: female</i> )                                                                                                                                 | -0.196 | 0.2844 | 0.477  | 1 | 0.490  |
| Percentage of clients using internet resources (1=None-19%) ( <i>ref.cat.: over 60%</i> )                                                                           | -0.192 | 0.4319 | 0.197  | 1 | 0.657  |
| Percentage of clients using internet resources (2=20-59%) ( <i>ref.cat.: over 60%</i> )                                                                             | -0.020 | 0.2759 | 0.005  | 1 | 0.942  |
| Frequency of situations in which clients question vet's advice (1=Never) ( <i>ref.cat.=Frequently/Always</i> )                                                      | -2.344 | 0.6516 | 12.945 | 1 | <0.001 |
| Frequency of situations in which clients question vet's advice (2=Occasionally) ( <i>ref.cat.=Frequently/Always</i> )                                               | -1.261 | 0.3562 | 12.525 | 1 | <0.001 |
| Employment type ( <i>ref. cat.: employed</i> )                                                                                                                      | 0.331  | 0.3277 | 1.018  | 1 | 0.313  |
| age                                                                                                                                                                 | 0.025  | 0.0102 | 5.870  | 1 | 0.015  |

|                                                                                                                                                                                                       |        |        |        |   |        |
|-------------------------------------------------------------------------------------------------------------------------------------------------------------------------------------------------------|--------|--------|--------|---|--------|
| Impact of internet resources on clients' desire to pursue therapy                                                                                                                                     | 0.524  | 0.1138 | 21.159 | 1 | <0.001 |
| Business type ( <i>ref. cat.: corporate-owned</i> )                                                                                                                                                   | -0.503 | 0.2486 | 4.090  | 1 | 0.043  |
| <b>Model 3 AUSTRIA: Clients' use of internet resources improves the discussion about diagnostic and treatment options as the clients have greater knowledge.</b><br>( $\chi^2(8)=7.986$ , $P=0.435$ ) |        |        |        |   |        |
| Gender ( <i>ref. cat.: female</i> )                                                                                                                                                                   | 0.238  | 0.6481 | 0.190  | 1 | 0.663  |
| Percentage of clients using internet resources (1=None-19%) ( <i>ref.cat.: over 60%</i> )                                                                                                             | 0.440  | 0.7391 | 0.354  | 1 | 0.552  |
| Percentage of clients using internet resources (2=20-59%) ( <i>ref.cat.: over 60%</i> )                                                                                                               | 0.307  | 0.5051 | 0.369  | 1 | 0.543  |
| Frequency of situations in which clients question vet's advice (1=Never) ( <i>ref.cat.=Frequently/Always</i> )                                                                                        | 2.799  | 1.3545 | 4.271  | 1 | 0.039  |
| Frequency of situations in which clients question vet's advice (2=Occasionally) ( <i>ref.cat.=Frequently/Always</i> )                                                                                 | 1.713  | 1.3142 | 1.699  | 1 | 0.192  |
| Employment type ( <i>ref. cat.: employed</i> )                                                                                                                                                        | 0.756  | 0.6655 | -0.548 | 1 | 0.256  |
| age                                                                                                                                                                                                   | -0.011 | 0.0326 | 0.113  | 1 | 0.737  |
| Impact of internet resources on clients' desire to pursue therapy                                                                                                                                     | 0.003  | 0.1913 | 0.000  | 1 | 0.988  |

|                                                                                                                                                                                                  |        |        |       |   |       |
|--------------------------------------------------------------------------------------------------------------------------------------------------------------------------------------------------|--------|--------|-------|---|-------|
| <b>Model 3 DENMARK: Clients' use of internet resources improves the discussion about diagnostic and treatment options as the clients have greater knowledge.</b><br>$(\chi^2(9)=9.300, P=0.410)$ |        |        |       |   |       |
| Gender ( <i>ref. cat.: female</i> )                                                                                                                                                              | 0.840  | 0.5121 | 2.692 | 1 | 0.101 |
| Percentage of clients using internet resources (1=None-19%) ( <i>ref.cat.: over 60%</i> )                                                                                                        | -0.480 | 0.5243 | 0.838 | 1 | 0.360 |
| Percentage of clients using internet resources (2=20-59%) ( <i>ref.cat.: over 60%</i> )                                                                                                          | -0.169 | 0.3976 | 0.181 | 1 | 0.670 |
| Frequency of situations in which clients question vet's advice (1=Never) ( <i>ref.cat.=Frequently/Always</i> )                                                                                   | 1.325  | 0.7807 | 2.882 | 1 | 0.090 |
| Frequency of situations in which clients question vet's advice (2=Occasionally) ( <i>ref.cat.=Frequently/Always</i> )                                                                            | 0.733  | 0.4537 | 2.612 | 1 | 0.106 |
| Employment type ( <i>ref. cat.: employed</i> )                                                                                                                                                   | -0.139 | 0.4277 | 0.105 | 1 | 0.746 |
| age                                                                                                                                                                                              | 0.021  | 0.0193 | 1.139 | 1 | 0.286 |
| Impact of internet resources on clients' desire to pursue therapy                                                                                                                                | -0.058 | 0.1512 | 0.147 | 1 | 0.208 |
| Business type ( <i>ref. cat.: corporate-owned</i> )                                                                                                                                              | 0.625  | 0.4960 | 1.587 | 1 | 0.208 |
| <b>Model 3 UK: Clients' use of internet resources improves the discussion about diagnostic and treatment options as the clients have greater knowledge.</b><br>$(\chi^2(9)=23.512, P=0.005)$     |        |        |       |   |       |
| Gender ( <i>ref. cat.: female</i> )                                                                                                                                                              | -0.594 | 0.2665 | 4.973 | 1 | 0.026 |

|                                                                                                                                                                      |        |        |        |   |        |
|----------------------------------------------------------------------------------------------------------------------------------------------------------------------|--------|--------|--------|---|--------|
| Percentage of clients using internet resources (1=None-19%) ( <i>ref.cat.: over 60%</i> )                                                                            | -0.575 | 0.4289 | 1.798  | 1 | 0.180  |
| Percentage of clients using internet resources (2=20-59%) ( <i>ref.cat.: over 60%</i> )                                                                              | 0.126  | 0.2632 | 0.228  | 1 | 0.633  |
| Frequency of situations in which clients question vet's advice (1=Never) ( <i>ref.cat.=Frequently/Always</i> )                                                       | -0.064 | 0.6167 | 0.011  | 1 | 0.917  |
| Frequency of situations in which clients question vet's advice (2=Occasionally) ( <i>ref.cat.=Frequently/Always</i> )                                                | 0.198  | 0.3404 | 0.338  | 1 | 0.561  |
| Employment type ( <i>ref. cat.: employed</i> )                                                                                                                       | -0.373 | 0.3173 | 1.379  | 1 | 0.240  |
| age                                                                                                                                                                  | 0.041  | 0.0100 | 16.835 | 1 | <0.001 |
| Impact of internet resources on clients' desire to pursue therapy                                                                                                    | 0.071  | 0.1029 | 0.475  | 1 | 0.491  |
| Business type ( <i>ref. cat.: corporate-owned</i> )                                                                                                                  | 0.171  | 0.2375 | 0.520  | 1 | 0.471  |
| <b>Model 4 AUSTRIA: Clients' use of internet resources can lead to situations where clients are better informed than I am.</b><br>( $\chi^2(8)=13.724$ , $P=0.089$ ) |        |        |        |   |        |
| Gender ( <i>ref. cat.: female</i> )                                                                                                                                  | -0.953 | 0.7322 | 1.695  | 1 | 0.193  |
| Percentage of clients using internet resources (1=None-19%) ( <i>ref.cat.: over 60%</i> )                                                                            | -0.083 | 0.7380 | 0.013  | 1 | 0.910  |



|                                                                                                                                                                      |         |        |       |   |       |
|----------------------------------------------------------------------------------------------------------------------------------------------------------------------|---------|--------|-------|---|-------|
| Percentage of clients using internet resources (2=20-59%) ( <i>ref.cat.: over 60%</i> )                                                                              | 0.929   | 0.5179 | 3.215 | 1 | 0.073 |
| Frequency of situations in which clients question vet's advice (1=Never) ( <i>ref.cat.=Frequently/Always</i> )                                                       | -4.033  | 1.4915 | 7.310 | 1 | 0.007 |
| Frequency of situations in which clients question vet's advice (2=Occasionally) ( <i>ref.cat.=Frequently/Always</i> )                                                | -3.757  | 1.4813 | 6.432 | 1 | 0.011 |
| Employment type ( <i>ref. cat.: employed</i> )                                                                                                                       | -0.215  | 0.6511 | 0.109 | 1 | 0.741 |
| age                                                                                                                                                                  | -0.043  | 0.0331 | 1.706 | 1 | 0.192 |
| Impact of internet resources on clients' desire to pursue therapy                                                                                                    | 0.127   | 0.2005 | 0.400 | 1 | 0.527 |
| <b>Model 4 DENMARK: Clients' use of internet resources can lead to situations where clients are better informed than I am.</b><br>( $\chi^2(9)=11.776$ , $P=0.226$ ) |         |        |       |   |       |
| Gender ( <i>ref. cat.: female</i> )                                                                                                                                  | -0.766  | 0.4745 | 2.608 | 1 | 0.106 |
| Percentage of clients using internet resources (1=None-19%) ( <i>ref.cat.: over 60%</i> )                                                                            | -0.164  | 0.4942 | 0.111 | 1 | 0.739 |
| Percentage of clients using internet resources (2=20-59%) ( <i>ref.cat.: over 60%</i> )                                                                              | -0.2471 | 0.3926 | 0.395 | 1 | 0.530 |
| Frequency of situations in which clients question vet's advice (1=Never) ( <i>ref.cat.=Frequently/Always</i> )                                                       | -0.625  | 0.7773 | 0.646 | 1 | 0.422 |

|                                                                                                                                                                 |        |        |       |   |       |
|-----------------------------------------------------------------------------------------------------------------------------------------------------------------|--------|--------|-------|---|-------|
| Frequency of situations in which clients question vet's advice (2=Occasionally) ( <i>ref.cat.=Frequently/Always</i> )                                           | 0.440  | 0.4548 | 0.934 | 1 | 0.334 |
| Employment type ( <i>ref. cat.: employed</i> )                                                                                                                  | -0.786 | 0.4231 | 3.453 | 1 | 0.063 |
| age                                                                                                                                                             | 0.038  | 0.0177 | 4.575 | 1 | 0.032 |
| Impact of internet resources on clients' desire to pursue therapy                                                                                               | -0.109 | 0.1317 | 0.690 | 1 | 0.406 |
| Business type ( <i>ref. cat.: corporate-owned</i> )                                                                                                             | 0.258  | 0.5005 | 0.265 | 1 | 0.606 |
| <b>Model 4 UK: Clients' use of internet resources can lead to situations where clients are better informed than I am.</b><br>( $\chi^2(9)=16.414$ , $P=0.059$ ) |        |        |       |   |       |
| Gender ( <i>ref. cat.: female</i> )                                                                                                                             | -0.713 | 0.2798 | 6.943 | 1 | 0.008 |
| Percentage of clients using internet resources (1=None-19%) ( <i>ref.cat.: over 60%</i> )                                                                       | -0.500 | 0.4098 | 1.488 | 1 | 0.223 |
| Percentage of clients using internet resources (2=20-59%) ( <i>ref.cat.: over 60%</i> )                                                                         | 0.226  | 0.2604 | 0.753 | 1 | 0.385 |
| Frequency of situations in which clients question vet's advice (1=Never) ( <i>ref.cat.=Frequently/Always</i> )                                                  | -0.011 | 0.6117 | 0.000 | 1 | 0.985 |
| Frequency of situations in which clients question vet's advice (2=Occasionally) ( <i>ref.cat.=Frequently/Always</i> )                                           | 0.414  | 0.3414 | 1.468 | 1 | 0.226 |

|                                                                                                                                                                                                                       |        |        |        |   |       |
|-----------------------------------------------------------------------------------------------------------------------------------------------------------------------------------------------------------------------|--------|--------|--------|---|-------|
| Employment type ( <i>ref. cat.: employed</i> )                                                                                                                                                                        | -0.017 | 0.3181 | 0.003  | 1 | 0.957 |
| age                                                                                                                                                                                                                   | 0.020  | 0.0096 | 4.421  | 1 | 0.035 |
| Impact of internet resources on clients' desire to pursue therapy                                                                                                                                                     | 0.064  | 0.1030 | 0.390  | 1 | 0.533 |
| Business type ( <i>ref. cat.: corporate-owned</i> )                                                                                                                                                                   | -0.323 | 0.2331 | 1.916  | 1 | 0.166 |
| <b>Model 5 AUSTRIA: Clients' use of internet resources causes clients to form strong opinions so that veterinarians have to justify their diagnostic and therapeutic steps.</b><br>( $\chi^2(8)=27.213$ , $P<0.001$ ) |        |        |        |   |       |
| Gender ( <i>ref. cat.: female</i> )                                                                                                                                                                                   | 0.272  | 0.6399 | 0.181  | 1 | 0.033 |
| Percentage of clients using internet resources (1=None-19%) ( <i>ref.cat.: over 60%</i> )                                                                                                                             | -1.646 | 0.7709 | 4.561  | 1 | 0.033 |
| Percentage of clients using internet resources (2=20-59%) ( <i>ref.cat.: over 60%</i> )                                                                                                                               | -1.530 | 0.5633 | 7.376  | 1 | 0.007 |
| Frequency of situations in which clients question vet's advice (1=Never) ( <i>ref.cat.=Frequently/Always</i> )                                                                                                        | -3.549 | 1.5486 | 5.5251 | 1 | 0.022 |
| Frequency of situations in which clients question vet's advice (2=Occasionally) ( <i>ref.cat.=Frequently/Always</i> )                                                                                                 | -1.568 | 1.5283 | 1.053  | 1 | 0.305 |
| Employment type ( <i>ref. cat.: employed</i> )                                                                                                                                                                        | 1.259  | 0.7169 | 3.085  | 1 | 0.079 |
| age                                                                                                                                                                                                                   | -0.067 | 0.0337 | 4.003  | 1 | 0.045 |

|                                                                                                                                                                                                                       |        |        |        |   |        |
|-----------------------------------------------------------------------------------------------------------------------------------------------------------------------------------------------------------------------|--------|--------|--------|---|--------|
| Impact of internet resources on clients' desire to pursue therapy                                                                                                                                                     | 0.002  | 0.2043 | 0.000  | 1 | 0.993  |
| <b>Model 5 DENMARK: Clients' use of internet resources causes clients to form strong opinions so that veterinarians have to justify their diagnostic and therapeutic steps.</b><br>( $\chi^2(9)=44.178$ , $P<0.001$ ) |        |        |        |   |        |
| Gender ( <i>ref. cat.: female</i> )                                                                                                                                                                                   | 0.551  | 0.5146 | 1.145  | 1 | 0.258  |
| Percentage of clients using internet resources (1=None-19%) ( <i>ref.cat.: over 60%</i> )                                                                                                                             | -0.626 | 0.5460 | 1.314  | 1 | 0.252  |
| Percentage of clients using internet resources (2=20-59%) ( <i>ref.cat.: over 60%</i> )                                                                                                                               | -0.327 | 0.4254 | 0.592  | 1 | 0.442  |
| Frequency of situations in which clients question vet's advice (1=Never) ( <i>ref.cat.=Frequently/Always</i> )                                                                                                        | -2.941 | 0.7917 | 13.798 | 1 | <0.001 |
| Frequency of situations in which clients question vet's advice (2=Occasionally) ( <i>ref.cat.=Frequently/Always</i> )                                                                                                 | -1.064 | 0.4759 | 4.996  | 1 | 0.025  |
| Employment type ( <i>ref. cat.: employed</i> )                                                                                                                                                                        | -0.588 | 0.4394 | 1.793  | 1 | 0.181  |
| age                                                                                                                                                                                                                   | -0.045 | 0.0188 | 5.711  | 1 | 0.017  |
| Impact of internet resources on clients' desire to pursue therapy                                                                                                                                                     | 0.496  | 0.1460 | 11.551 | 1 | <0.001 |
| Business type ( <i>ref. cat.: corporate-owned</i> )                                                                                                                                                                   | 0.912  | 0.5326 | 2.943  | 1 | 0.087  |

|                                                                                                                                                                                                                  |        |        |        |   |        |
|------------------------------------------------------------------------------------------------------------------------------------------------------------------------------------------------------------------|--------|--------|--------|---|--------|
| <b>Model 5 UK: Clients' use of internet resources causes clients to form strong opinions so that veterinarians have to justify their diagnostic and therapeutic steps.</b><br>( $\chi^2(9)=49.313$ , $P<0.001$ ) |        |        |        |   |        |
| Gender ( <i>ref. cat.: female</i> )                                                                                                                                                                              | -0.161 | 0.2772 | 0.336  | 1 | 0.562  |
| Percentage of clients using internet resources (1=None-19%) ( <i>ref.cat.: over 60%</i> )                                                                                                                        | -0.616 | 0.4140 | 2.216  | 1 | 0.137  |
| Percentage of clients using internet resources (2=20-59%) ( <i>ref.cat.: over 60%</i> )                                                                                                                          | -0.222 | 0.2644 | 0.705  | 1 | 0.401  |
| Frequency of situations in which clients question vet's advice (1=Never) ( <i>ref.cat.=Frequently/Always</i> )                                                                                                   | -2.325 | 0.6240 | 13.886 | 1 | <0.001 |
| Frequency of situations in which clients question vet's advice (2=Occasionally) ( <i>ref.cat.=Frequently/Always</i> )                                                                                            | -0.961 | 0.3349 | 8.228  | 1 | 0.004  |
| Employment type ( <i>ref. cat.: employed</i> )                                                                                                                                                                   | -0.030 | 0.3326 | 0.008  | 1 | 0.929  |
| age                                                                                                                                                                                                              | -0.028 | 0.0101 | 7.828  | 1 | 0.005  |
| Impact of internet resources on clients' desire to pursue therapy                                                                                                                                                | 0.218  | 0.1062 | 4.216  | 1 | 0.040  |
| Business type ( <i>ref. cat.: corporate-owned</i> )                                                                                                                                                              | -0.369 | 0.2430 | 2.305  | 1 | 0.129  |
| <b>Model 6 AUSTRIA: Clients' use of internet resources creates a wrong impression of modern small animal practice.</b><br>( $\chi^2(8)=15.773$ , $P=0.046$ )                                                     |        |        |        |   |        |
| Gender ( <i>ref. cat.: female</i> )                                                                                                                                                                              | -1.637 | 0.6647 | 6.068  | 1 | 0.014  |

|                                                                                                                                                              |        |        |        |   |       |
|--------------------------------------------------------------------------------------------------------------------------------------------------------------|--------|--------|--------|---|-------|
| Percentage of clients using internet resources (1=None-19%) ( <i>ref.cat.: over 60%</i> )                                                                    | -0.262 | 0.7645 | 0.117  | 1 | 0.732 |
| Percentage of clients using internet resources (2=20-59%) ( <i>ref.cat.: over 60%</i> )                                                                      | 0.604  | 0.5513 | -1.199 | 1 | 0.273 |
| Frequency of situations in which clients question vet's advice (1=Never) ( <i>ref.cat.=Frequently/Always</i> )                                               | -3.272 | 1.2546 | 6.803  | 1 | 0.009 |
| Frequency of situations in which clients question vet's advice (2=Occasionally) ( <i>ref.cat.=Frequently/Always</i> )                                        | -2.148 | 1.1984 | 3.212  | 1 | 0.073 |
| Employment type ( <i>ref. cat.: employed</i> )                                                                                                               | 0.348  | 0.6723 | 0.268  | 1 | 0.605 |
| age                                                                                                                                                          | 0.008  | 0.0310 | 0.063  | 1 | 0.802 |
| Impact of internet resources on clients' desire to pursue therapy                                                                                            | -0.188 | 0.275  | 0.750  | 1 | 0.387 |
| <b>Model 6 DENMARK: Clients' use of internet resources creates a wrong impression of modern small animal practice.</b><br>( $\chi^2(9)=16.256$ , $P=0.062$ ) |        |        |        |   |       |
| Gender ( <i>ref. cat.: female</i> )                                                                                                                          | 0.298  | 0.5106 | 0.342  | 1 | 0.559 |
| Percentage of clients using internet resources (1=None-19%) ( <i>ref.cat.: over 60%</i> )                                                                    | -0.867 | 0.5298 | 2.679  | 1 | 0.102 |
| Percentage of clients using internet resources (2=20-59%) ( <i>ref.cat.: over 60%</i> )                                                                      | -0.301 | 0.4158 | 0.524  | 1 | 0.469 |

|                                                                                                                                                         |        |        |        |   |        |
|---------------------------------------------------------------------------------------------------------------------------------------------------------|--------|--------|--------|---|--------|
| Frequency of situations in which clients question vet's advice (1=Never)<br>( <i>ref.cat.=Frequently/Always</i> )                                       | -1.668 | 0.7432 | 5.038  | 1 | 0.025  |
| Frequency of situations in which clients question vet's advice (2=Occasionally)<br>( <i>ref.cat.=Frequently/Always</i> )                                | -0.336 | 0.4703 | 0.511  | 1 | 0.475  |
| Employment type ( <i>ref. cat.: employed</i> )                                                                                                          | -0.225 | 0.4438 | 0.256  | 1 | 0.613  |
| age                                                                                                                                                     | -0.020 | 0.0184 | 1.195  | 1 | 0.274  |
| Impact of internet resources on clients' desire to pursue therapy                                                                                       | 0.164  | 0.1492 | 1.201  | 1 | 0.273  |
| Business type ( <i>ref. cat.: corporate-owned</i> )                                                                                                     | 0.618  | 0.5507 | 1.261  | 1 | 0.261  |
| <b>Model 6 UK: Clients' use of internet resources creates a wrong impression of modern small animal practice.</b><br>( $\chi^2(9)=40.031$ , $P<0.001$ ) |        |        |        |   |        |
| Gender ( <i>ref. cat.: female</i> )                                                                                                                     | 0.047  | 0.2717 | 0.030  | 1 | 0.863  |
| Percentage of clients using internet resources (1=None-19%) ( <i>ref.cat.: over 60%</i> )                                                               | -0.764 | 0.4294 | 3.170  | 1 | 0.075  |
| Percentage of clients using internet resources (2=20-59%) ( <i>ref.cat.: over 60%</i> )                                                                 | -0.281 | 0.2683 | 1.137  | 1 | 0.286  |
| Frequency of situations in which clients question vet's advice (1=Never)<br>( <i>ref.cat.=Frequently/Always</i> )                                       | -2.624 | 0.6240 | 17.682 | 1 | <0.001 |

|                                                                                                                        |        |        |       |   |       |
|------------------------------------------------------------------------------------------------------------------------|--------|--------|-------|---|-------|
| Frequency of situations in which clients question vet's advice (2=Occasionally)<br><i>(ref.cat.=Frequently/Always)</i> | -0.668 | 0.339  | 4.001 | 1 | 0.045 |
| Employment type <i>(ref. cat.: employed)</i>                                                                           | 0.160  | 0.3253 | 0.242 | 1 | 0.623 |
| age                                                                                                                    | -0.004 | 0.0099 | 0.174 | 1 | 0.677 |
| Impact of internet resources on clients' desire to pursue therapy                                                      | 0.265  | 0.1073 | 6.080 | 1 | 0.014 |
| Business type <i>(ref. cat.: corporate-owned)</i>                                                                      | -0.261 | 0.2414 | 1.166 | 1 | 0.280 |
